# Supplementary material for: The Pinatubo CO2 pause suggests a rapidly testable path to multi-Gt mCDR
Source: Research Square preprint supplement (doi:10.21203/rs.3.rs-6960838/v1), 2025-07-15
Supplement: Supplementary file 1 [file 3744f385c691f06dc102b5f9.xlsx]

## Sheet: Fig 1 manual nonlinear regr
					const frac		minimum =	4.84	0.15125		Delta from	280	variable frac			variable frac		minimum	variable frac			Delta from			7e-22		year	month	decimal date		deseasonalized	exponential		8.0988
			Annual CO2		0.602	4.91372	0.603	4.84403	0.604	4.87829	NOAA data	fraction	0.0152		8.43638	0.0153		7.95951	0.0154		8.04586	NOAA data					1955		1955		313.43	312.183		0.246664	1980.04	337.741	338.13		1980.04	332.213		y = 7E-22e0.0266x
Entity	Code	Year	emissions					0.151376			2.45672	into ocean						0.248735				-2.34021					1958	3	1958.2	315.7	314.43	314.512	30.16	0.00665493	1980.12	337.875	337.85		1980.12	332.368
World	OWID_WRL	1950	5930243600		310.5		310.5		310.5					312.2			312.2			312.2						9.65353	1958	4	1958.29	317.45	315.16	314.576	29.71	0.340669	1980.21	338.009	338.51		1980.21	332.522
World	OWID_WRL	1951	6381428700	451185100	310.956		310.957		310.958			0.665285	312.958	312.457		312.958	312.454		312.958	312.45						8.82539	1958	5	1958.37	317.51	314.71	314.639	30.14	0.00502638	1980.29	338.143	338.31		1980.29	332.677
World	OWID_WRL	1952	6467460600	86031900	311.447		311.449		311.45			0.621577	313.273	312.767		313.269	312.76		313.266	312.754						8.56458	1958	6	1958.45	317.24	315.14	314.704	30.18	0.190016	1980.38	338.276	338.4		1980.38	332.831
World	OWID_WRL	1953	6650885000	183424400	311.945		311.947		311.95			0.616761	313.593	313.083		313.587	313.073		313.58	313.063						8.41396	1958	7	1958.54	315.86	315.18	314.767	31.18	0.170433	1980.46	338.41	338.85		1980.46	332.985
World	OWID_WRL	1954	6789529000	138644000	312.457		312.46		312.463			0.60359	313.933	313.417		313.923	313.404		313.913	313.391						8.37288	1958	8	1958.62	314.93	316.18	314.832	31.08	1.81585	1980.54	338.544	338.56		1980.54	333.14
World	OWID_WRL	1955	7443896000	654367000	312.979		312.983		312.987			0.595284	314.285	313.764		314.272	313.748		314.259	313.731						8.0988	1958	9	1958.71	313.2	316.08	314.898	30.41	1.3973	1980.62	338.678	339.07		1980.62	333.294
World	OWID_WRL	1956	7926013000	482117000	313.552		313.557		313.562			0.548602	314.715	314.188		314.699	314.168		314.683	314.149						8.12412	1958	10	1958.79	312.43	315.41	314.961	30.2	0.20119	1980.71	338.812	339.38		1980.71	333.449
World	OWID_WRL	1957	8185645000	259632000	314.162		314.168		314.174			0.521295	315.201	314.666		315.181	314.643		315.162	314.62				NOAA data			1958	11	1958.87	313.33	315.2	315.027	30.43	0.0298218	1980.79	338.946	339.4		1980.79	333.603
World	OWID_WRL	1958	8417187300	231542300	314.791		314.799		314.806			0.510812	315.712	315.169		315.689	315.143		315.666	315.117				mean	year	beginning	1958	12	1958.96	314.67	315.43	315.091	30.55	0.114822	1980.88	339.08	339.46		1980.88	333.758
World	OWID_WRL	1959	8854690000	437502700	315.439	0.012292	315.447	0.0105401	315.456	0.00892276	-0.102665	0.502954	316.245	315.694	0.0206897	316.219	315.665	0.0131429	316.193	315.635	0.00730491	-0.114643		315.98	1959	315.55	1959	1	1959.04	315.58	315.55	315.157	30.86	0.154262	1980.96	339.213	339.26		1980.96	333.912
World	OWID_WRL	1960	9387011000	532321000	316.12	0.0573915	316.13	0.0530054	316.139	0.0487936	-0.230229	0.484942	316.826	316.266	0.00886898	316.796	316.233	0.0160295	316.767	316.201	0.0252847	0.126608	0.00384287	316.91	1960	316.36	1959	2	1959.13	316.48	315.86	315.223	30.38	0.405144	1981.04	339.347	339.42		1981.04	334.066
World	OWID_WRL	1961	9415042000	28031000	316.843	0.000299393	316.853	4.57914e-05	316.864	1.42062e-05	-0.00676694	0.464799	317.466	316.896	0.00130458	317.433	316.86	1.90414e-07	317.401	316.825	0.00123989	-0.000436364	0.184919	317.64	1961	316.86	1959	3	1959.2	316.65	315.38	315.283	30.41	0.00931535	1981.12	339.481	339.98		1981.12	334.221
World	OWID_WRL	1962	9747287000	332245000	317.567	0.117569	317.579	0.109657	317.591	0.10202	-0.331144	0.470023	318.099	317.52	0.151818	318.064	317.481	0.183686	318.028	317.443	0.218548	0.428586	0.331148	318.45	1962	317.91	1959	4	1959.29	317.72	315.41	315.35	30.49	0.00358523	1981.21	339.615	340.08		1981.21	334.375
World	OWID_WRL	1963	10266772000	519485000	318.317	0.146613	318.33	0.136838	318.343	0.127399	-0.369916	0.461194	318.766	318.177	0.273598	318.727	318.135	0.319557	318.688	318.093	0.369023	0.565293	0.563498	318.99	1963	318.7	1959	5	1959.37	318.29	315.49	315.415	31.03	0.00566675	1981.29	339.749	339.98		1981.29	334.53
World	OWID_WRL	1964	10824465000	557693000	319.107	0.187443	319.121	0.175268	319.136	0.163501	-0.41865	0.445599	319.489	318.889	0.423913	319.447	318.843	0.485274	319.405	318.798	0.550698	0.696616	0.350167	319.62	1964	319.54	1959	6	1959.45	318.15	316.03	315.482	30.86	0.300739	1981.38	339.883	339.97		1981.38	334.684
World	OWID_WRL	1965	11310600000	486135000	319.94	0.29151	319.956	0.308689	319.971	0.326359	0.555598	0.430693	320.272	319.66	0.0677397	320.227	319.611	0.0446932	320.181	319.563	0.0264423	-0.211408	0.215448	320.04	1965	319.4	1959	7	1959.54	316.54	315.86	315.547	31.06	0.0982743	1981.46	340.016	340.06		1981.46	334.839
World	OWID_WRL	1966	11862647000	552047000	320.81	0.0484815	320.827	0.0563169	320.844	0.0647389	0.237312	0.420326	321.106	320.481	0.0118619	321.057	320.429	0.0259648	321.008	320.377	0.0454915	0.161136	0.312146	321.37	1966	320.59	1959	8	1959.62	314.8	316.06	315.614	31.73	0.19917	1981.54	340.15	339.92		1981.54	334.993
World	OWID_WRL	1967	12237369000	374722000	321.723	0.321569	321.742	0.300773	321.76	0.280672	-0.548427	0.409178	321.997	321.359	0.866917	321.945	321.303	0.973593	321.893	321.248	1.08629	0.986708	0.492114	322.18	1967	322.29	1959	9	1959.71	313.84	316.73	315.681	31.33	1.10023	1981.62	340.284	339.87		1981.62	335.147
World	OWID_WRL	1968	12905284000	667915000	322.665	0.0155019	322.685	0.020942	322.705	0.0271987	0.144713	0.404932	322.923	322.271	0.0725938	322.867	322.212	0.107911	322.812	322.153	0.150135	0.328498	0.698443	323.05	1968	322.54	1959	10	1959.79	313.33	316.33	315.746	31.68	0.340516	1981.71	340.418	340.17		1981.71	335.302
World	OWID_WRL	1969	13761785000	856501000	323.657	0.0976722	323.679	0.0844886	323.701	0.0722604	-0.290669	0.392781	323.92	323.252	0.514904	323.861	323.19	0.608591	323.802	323.127	0.709931	0.780122	0.625847	324.62	1969	323.97	1959	11	1959.87	314.81	316.68	315.814	31.35	0.749554	1981.79	340.552	340.39		1981.79	335.456
World	OWID_WRL	1970	14899124000	1137339000	324.716	0.0983802	324.74	0.0841237	324.764	0.0709827	-0.290041	0.377561	325.011	324.327	0.493958	324.949	324.261	0.591237	324.886	324.195	0.697066	0.76892	0.743336	325.68	1970	325.03	1959	12	1959.96	315.58	316.35	315.88	31.4	0.220968	1981.88	340.686	340.75		1981.88	335.611
World	OWID_WRL	1971	15503855000	604731000	325.863	0.0768824	325.888	0.0633817	325.914	0.0511835	-0.251757	0.358474	326.231	325.529	0.373633	326.165	325.459	0.463713	326.099	325.389	0.563326	0.680965	0.501705	326.32	1971	326.14	1960	1	1960.04	316.43	316.4	315.948	31.36	0.204428	1981.96	340.82	340.85		1981.96	335.765
World	OWID_WRL	1972	16224597000	720742000	327.056	0.0815859	327.083	0.0980526	327.111	0.116032	0.313133	0.353847	327.51	326.788	0.000329956	327.441	326.715	0.00305033	327.371	326.642	0.0165091	0.0552298	0.414731	327.46	1972	326.77	1960	2	1960.13	316.98	316.36	316.016	31.28	0.118416	1982.04	340.954	341.09		1982.04	335.92
World	OWID_WRL	1973	17085094000	860497000	328.304	0.0605173	328.334	0.046841	328.363	0.0349141	-0.216428	0.347663	328.862	328.119	0.185623	328.788	328.042	0.258061	328.715	327.965	0.342232	0.507997	0.142	329.68	1973	328.55	1960	3	1960.2	317.58	316.28	316.08	31.7	0.0401451	1982.12	341.087	341.16		1982.12	336.074
World	OWID_WRL	1974	17011072000	-74022000	329.619	0.0891448	329.65	0.109118	329.682	0.131108	0.33033	0.339898	330.303	329.538	0.0476265	330.226	329.457	0.0188313	330.149	329.376	0.00317896	-0.137227	0.123096	330.19	1974	329.32	1960	4	1960.29	319.03	316.7	316.148	32.22	0.304727	1982.21	341.221	341.18		1982.21	336.228
World	OWID_WRL	1975	17052752000	41680000	330.927	0.00764747	330.961	0.0147337	330.995	0.0241228	0.121382	0.350281	331.712	330.926	0.00746882	331.631	330.841	2.19933e-06	331.551	330.757	0.00693559	-0.00148302	-0.226172	331.13	1975	330.84	1960	5	1960.37	320.04	317.22	316.214	32.47	1.01143	1982.29	341.355	341.32		1982.29	336.383
World	OWID_WRL	1976	17989112000	936360000	332.24	0.32437	332.276	0.366809	332.312	0.411855	0.605647	0.358237	333.106	332.299	0.395334	333.021	332.21	0.29139	332.936	332.121	0.203442	-0.539805	-0.482109	332.03	1976	331.67	1960	6	1960.46	319.59	317.47	316.283	32.52	1.40904	1982.38	341.489	341.67		1982.38	336.537
World	OWID_WRL	1977	18498636000	509524000	333.624	0.728747	333.662	0.795804	333.7	0.865811	0.892078	0.349216	334.598	333.768	0.99618	334.509	333.675	0.819096	334.42	333.582	0.659661	-0.905039	-0.538942	333.84	1977	332.77	1960	7	1960.54	318.18	317.52	316.35	32.19	1.36981	1982.46	341.623	341.43		1982.46	336.692
World	OWID_WRL	1978	19069290000	570654000	335.047	0.00136919	335.088	0.00604947	335.129	0.0140551	0.0777783	0.348907	336.132	335.279	0.0724796	336.039	335.182	0.0295777	335.947	335.085	0.00561952	-0.171982	-0.53157	335.41	1978	335.01	1960	8	1960.62	315.9	317.19	316.419	32.08	0.595045	1982.54	341.757	341.61		1982.54	336.846
World	OWID_WRL	1979	19609020000	539730000	336.514	0.0865807	336.557	0.113879	336.601	0.144911	0.337459	0.347827	337.717	336.839	0.383422	337.619	336.738	0.268001	337.522	336.636	0.173391	-0.517688	-0.299064	336.84	1979	336.22	1960	9	1960.71	314.17	317.08	316.488	31.83	0.350731	1982.62	341.891	341.64		1982.62	337.001
World	OWID_WRL	1980	19488524000	-120496000	338.023	0.0114452	338.069	0.00375315	338.114	0.000241605	-0.0612629	0.347587	339.345	338.443	0.0982353	339.244	338.338	0.043065	339.143	338.232	0.0103776	-0.207521	-0.400974	338.76	1980	338.13	1960	10	1960.79	313.83	316.83	316.555	31.88	0.0757269	1982.71	342.024	341.56		1982.71	337.155
World	OWID_WRL	1981	19022903000	-465621000	339.523	0.01051	339.571	0.022719	339.619	0.0395765	0.150728	0.358397	340.934	340.008	0.345848	340.828	339.898	0.228208	340.723	339.788	0.135133	-0.477711	-0.323554	340.12	1981	339.42	1960	11	1960.87	315	316.88	316.624	31.96	0.0653759	1982.79	342.158	341.77		1982.79	337.31
World	OWID_WRL	1982	18871097000	-151806000	340.986	0.010776	341.037	0.00282662	341.087	6.37305e-06	-0.053166	0.375191	342.439	341.49	0.160289	342.329	341.375	0.0814699	342.219	341.261	0.0291677	-0.285429	-0.608191	341.48	1982	341.09	1960	12	1960.96	316.19	316.96	316.692	31.86	0.0719545	1982.88	342.292	341.59		1982.88	337.464
World	OWID_WRL	1983	18991910000	120813000	342.438	0.473601	342.491	0.549437	342.544	0.630902	0.74124	0.386226	343.902	342.931	1.39475	343.787	342.811	1.12664	343.673	342.692	0.887695	-1.06143	-0.42251	343.15	1983	341.75	1961	1	1961.04	316.89	316.86	316.762	32.08	0.00966869	1982.96	342.426	341.71		1982.96	337.618
World	OWID_WRL	1984	19647801000	655891000	343.899	0.17684	343.955	0.133257	344.01	0.0958288	-0.365043	0.391901	345.358	344.365	0.00201963	345.239	344.241	0.00629329	345.12	344.117	0.0413205	0.0793302	-0.37423	344.87	1984	344.32	1961	2	1961.13	317.7	317.08	316.832	32.26	0.0615846	1983.04	342.56	341.75		1983.04	337.773
World	OWID_WRL	1985	20311902000	664101000	345.411	0.0319581	345.469	0.0145869	345.527	0.00394186	-0.120776	0.387519	346.876	345.86	0.0727082	346.752	345.731	0.0197649	346.628	345.602	0.000141068	-0.140588	-0.174183	346.35	1985	345.59	1961	3	1961.2	318.54	317.26	316.895	32.16	0.132952	1983.12	342.694	342.25		1983.12	337.927
World	OWID_WRL	1986	20614963000	303061000	346.974	0.0237422	347.035	0.0460846	347.095	0.0757688	0.214673	0.38361	348.456	347.415	0.354286	348.327	347.281	0.21279	348.198	347.148	0.107407	-0.461291	-0.262764	347.61	1986	346.82	1961	4	1961.29	319.48	317.16	316.966	32.76	0.037655	1983.21	342.827	341.85		1983.21	338.082
World	OWID_WRL	1987	21250075000	635112000	348.56	0.00994871	348.623	0.00133372	348.687	0.000713041	-0.0365202	0.386352	350.05	348.985	0.105817	349.916	348.846	0.0347492	349.783	348.708	0.0022959	-0.186411	-0.208407	349.31	1987	348.66	1961	5	1961.37	320.58	317.76	317.034	32.63	0.526544	1983.29	342.961	342.76		1983.29	338.236
World	OWID_WRL	1988	22085130000	835055000	350.195	0.0868506	350.261	0.0523335	350.327	0.0265124	-0.228765	0.383518	351.701	350.611	0.0147494	351.562	350.468	0.000505438	351.424	350.324	0.0275564	0.0224819	0.219051	351.69	1988	350.49	1961	6	1961.45	319.77	317.63	317.105	32.88	0.275416	1983.38	343.095	342.97		1983.38	338.391
World	OWID_WRL	1989	22386637000	301507000	351.895	1.19993	351.963	1.05401	352.032	0.917554	-1.02665	0.37798	353.434	352.318	0.451599	353.29	352.169	0.674175	353.147	352.02	0.940356	0.821081	0.24711	353.2	1989	352.99	1961	7	1961.54	318.57	317.88	317.174	33.06	0.498517	1983.46	343.229	343.3		1983.46	338.545
World	OWID_WRL	1990	22728989000	342352000	353.617	0.0265444	353.689	0.00833597	353.76	0.000387243	-0.0913015	0.381339	355.179	354.037	0.0658137	355.03	353.882	0.0104519	354.882	353.728	0.0026644	-0.102234	0.00214115	354.45	1990	353.78	1961	8	1961.62	316.79	318.06	317.245	32.9	0.664036	1983.54	343.363	343.56		1983.54	338.699
World	OWID_WRL	1991	23186102000	457113000	355.366		355.44		355.515		0.540434	0.384019	356.942	355.772		356.787	355.612		356.633	355.453		-0.712424	-0.632776	355.7	1991	354.9	1961	9	1961.71	314.99	317.9	317.316	33.32	0.340516	1983.62	343.497	343.89		1983.62	338.854
World	OWID_WRL	1992	22528172000	-657930000	357.15		357.227		357.305		0.9374	0.384942	358.736	357.539		358.576	357.374		358.417	357.209		-1.08367	-1.25375	356.54	1992	356.29	1961	10	1961.79	315.31	318.32	317.386	32.99	0.872906	1983.71	343.631	343.59		1983.71	339.008
World	OWID_WRL	1993	22755787000	227615000	358.883		358.964		359.044		1.90366	0.403316	360.418	359.196		360.253	359.025		360.088	358.855		-1.96517	-1.82629	357.21	1993	357.06	1961	11	1961.87	316.1	317.99	317.457	32.79	0.283578	1983.79	343.765	343.86		1983.79	339.163		2.04
World	OWID_WRL	1994	22992947000	237160000	360.634		360.717		360.801		2.46746	0.407134	362.104	360.856		361.934	360.68		361.764	360.504		-2.43004	-2.27489	358.96	1994	358.25	1961	12	1961.96	317.01	317.79	317.527	32.91	0.0691397	1983.88	343.898	343.92		1983.88	339.317		2.33
World	OWID_WRL	1995	23532083000	539136000	362.403		362.49		362.576		2.57954	0.410717	363.795	362.521		363.619	362.339		363.443	362.158		-2.42945	-2.30693	360.97	1995	359.91	1962	1	1962.04	317.94	317.91	317.599	32.92	0.0966651	1983.96	344.032	344.12		1983.96	339.472		2.27
World	OWID_WRL	1996	24258169000	726086000	364.214		364.303		364.392		2.32317	0.409403	365.529	364.229		365.347	364.041		365.166	363.854		-2.06131	-2.4231	362.74	1996	361.98	1962	2	1962.13	318.55	317.92	317.671	33.39	0.0618517	1984.04	344.166	344.32		1984.04	339.626		2.21333
World	OWID_WRL	1997	24401906000	143737000	366.08		366.173		366.265		3.14276	0.40548	367.329	366.002		367.142	365.809		366.955	365.616		-2.77853	-2.40554	363.88	1997	363.03	1962	3	1962.2	319.68	318.39	317.737	33.24	0.426818	1984.12	344.3	344.39		1984.12	339.78
World	OWID_WRL	1998	24303778000	-98128000	367.958		368.053		368.149		2.86343	0.410761	369.121	367.766		368.927	367.567		368.735	367.368		-2.37679	-2.10371	366.84	1998	365.19	1962	4	1962.29	320.57	318.24	317.809	33.18	0.185487	1984.21	344.434	344.26		1984.21	339.935
World	OWID_WRL	1999	24853730000	549952000	369.828		369.927		370.025		1.79653	0.41966	370.873	369.491		370.673	369.286		370.474	369.081		-1.1558	-1.78011	368.54	1999	368.13	1962	5	1962.37	321.02	318.18	317.88	33.47	0.0901648	1984.29	344.568	344.75		1984.29	340.089
World	OWID_WRL	2000	25510554000	656824000	371.74		371.842		371.944		2.60202	0.418284	372.668	371.259		372.462	371.048		372.258	370.837		-1.80773	-1.74297	369.71	2000	369.24	1962	6	1962.45	320.62	318.47	317.953	33.92	0.267682	1984.38	344.702	344.59		1984.38	340.244
World	OWID_WRL	2001	25706293000	195739000	373.703		373.808		373.913		3.20814	0.415567	374.52	373.083		374.308	372.865		374.097	372.648		-2.26536	-2.09097	371.32	2001	370.6	1962	7	1962.54	319.61	318.92	318.023	33.68	0.803953	1984.46	344.835	344.73		1984.46	340.398
World	OWID_WRL	2002	26276870000	570577000	375.681		375.789		375.898		3.30934	0.419909	376.369	374.904		376.151	374.68		375.934	374.456		-2.19982	-2.06117	373.45	2002	372.48	1962	8	1962.62	317.4	318.68	318.097	34.17	0.340343	1984.54	344.969	345.02		1984.54	340.553
World	OWID_WRL	2003	27669490000	1392620000	377.703		377.815		377.926		2.99451	0.418683	378.262	376.769		378.038	376.538		377.815	376.309		-1.71833	-1.83395	375.98	2003	374.82	1962	9	1962.71	316.25	319.17	318.17	33.45	0.999931	1984.62	345.103	345.12		1984.62	340.707
World	OWID_WRL	2004	28632506000	963016000	379.832		379.947		380.062		2.98701	0.406461	380.305	378.781		380.075	378.544		379.845	378.308		-1.58368	-1.85718	377.7	2004	376.96	1962	10	1962.79	315.42	318.45	318.241	33.58	0.0435582	1984.71	345.237	344.76		1984.71	340.861
World	OWID_WRL	2005	29614395000	981889000	382.035		382.154		382.273		3.78373	0.4013	382.44	380.883		382.203	380.64		381.967	380.397		-2.26954	-1.78338	379.98	2005	378.37	1962	11	1962.87	316.69	318.58	318.315	33.47	0.0701414	1984.79	345.371	345.19		1984.79	341.016
World	OWID_WRL	2006	30628397000	1014002000	384.314		384.436		384.559		3.10613	0.396577	384.668	383.077		384.425	382.827		384.182	382.577		-1.49692	-1.9983	382.09	2006	381.33	1962	12	1962.96	317.7	318.47	318.387	33.7	0.00692891	1984.88	345.505	345.41		1984.88	341.17
World	OWID_WRL	2007	31534645000	906248000	386.67		386.797		386.923		3.91668	0.392106	386.992	385.366		386.742	385.108		386.492	384.852		-2.22844	-1.88483	384.02	2007	382.88	1963	1	1963.04	318.74	318.7	318.461	33.44	0.0571729	1984.96	345.639	345.88		1984.96	341.325
World	OWID_WRL	2008	32074200000	539555000	389.097		389.227		389.358		3.68707	0.38944	389.396	387.733		389.139	387.469		388.883	387.206		-1.92912	-2.38638	385.83	2008	385.54	1963	2	1963.13	319.07	318.44	318.535	33.57	0.00906378	1985.04	345.772	345.59		1985.04	341.479
World	OWID_WRL	2009	31541922000	-532278000	391.564		391.699		391.834		4.83905	0.391179	391.833	390.133		391.569	389.862		391.305	389.591		-3.00158	-2.82038	387.64	2009	386.86	1963	3	1963.2	319.86	318.57	318.602	34.05	0.00105591	1985.12	345.906	345.92		1985.12	341.634
World	OWID_WRL	2010	33355903000	1813981000	393.991		394.13		394.269		5.51	0.40498	394.164	392.429		393.893	392.15		393.623	391.873		-3.53045	-3.32488	390.1	2010	388.62	1963	4	1963.29	321.38	319.05	318.677	34.4	0.138949	1985.21	346.04	346.56		1985.21	341.788
World	OWID_WRL	2011	34504540000	1148637000	396.558		396.701		396.844		5.51076	0.392151	396.692	394.919		396.414	394.633		396.136	394.348		-3.4426	-3.70813	391.85	2011	391.19	1963	5	1963.37	322.25	319.4	318.75	34.32	0.422893	1985.29	346.174	346.08		1985.29	341.943
World	OWID_WRL	2012	35000020000	495480000	399.213		399.36		399.507		6.29004	0.387839	399.329	397.515		399.043	397.221		398.758	396.929		-4.15134	-3.93559	394.06	2012	393.07	1963	6	1963.45	321.48	319.32	318.825	34.05	0.245307	1985.38	346.308	346.12		1985.38	342.097
World	OWID_WRL	2013	35301655000	301635000	401.906		402.058		402.209		6.43751	0.390584	401.988	400.134		401.695	399.833		401.402	399.533		-4.21283	-4.35549	396.74	2013	395.62	1963	7	1963.54	319.74	319.05	318.898	34.05	0.0232499	1985.46	346.442	346.23		1985.46	342.251
World	OWID_WRL	2014	35450094000	148439000	404.622		404.778		404.935		7.03823	0.395254	404.646	402.752		404.345	402.442		404.045	402.134		-4.70232	-4.67524	398.81	2014	397.74	1963	8	1963.62	317.77	319.05	318.973	34.14	0.00594467	1985.54	346.576	346.08		1985.54	342.406
World	OWID_WRL	2015	35404900000	-45194000	407.35		407.51		407.671		7.59039	0.401372	407.282	405.348		406.973	405.031		406.665	404.715		-5.11057	-4.97881	401.01	2015	399.92	1963	9	1963.71	316.21	319.14	319.048	34.02	0.0083796	1985.62	346.709	346.57		1985.62	342.56
World	OWID_WRL	2016	35416658000	11758000	410.074		410.239		410.404		7.78907	0.409347	409.873	407.899		409.556	407.574		409.24	407.25		-5.12353	-4.75773	404.41	2016	402.45	1963	10	1963.79	315.99	319.02	319.122	33.97	0.010362	1985.71	346.843	346.59		1985.71	342.715
World	OWID_WRL	2017	35989897000	573239000	412.799		412.969		413.139		6.92865	0.416558	412.426	410.413		412.1	410.079		411.776	409.747		-4.03907	-4.65367	406.76	2017	406.04	1963	11	1963.87	317.07	318.97	319.198	34.13	0.0518966	1985.79	346.977	346.6		1985.79	342.869
World	OWID_WRL	2018	36730425000	740528000	415.568		415.742		415.917		7.92241	0.417671	415.013	412.96		414.679	412.618		414.347	412.278		-4.79842	-4.4532	408.72	2018	407.82	1963	12	1963.96	318.35	319.13	319.271	34.54	0.0200209	1985.88	347.111	346.82		1985.88	343.024
World	OWID_WRL	2019	37104275000	373850000	418.394		418.573		418.752		7.88324	0.417127	417.655	415.563		417.313	415.212		416.972	414.863		-4.52211	-4.62457	411.65	2019	410.69	1964	1	1964.04	319.57	319.54	319.348	34.37	0.0369812	1985.96	347.245	347.04		1985.96	343.178
World	OWID_WRL	2020	35126526000	-1977749000	421.249		421.433		421.617		8.17289	0.42045	420.305	418.172		419.954	417.813		419.605	417.455		-4.55318	-4.67694	414.21	2020	413.26	1964	2	1964.13	320.01	319.37	319.424	34.41	0.00291499	1986.04	347.379	346.82		1986.04	343.332
World	OWID_WRL	2021	36991734000	1865208000	423.952		424.14		424.329		8.97011	0.449028	422.662	420.493		422.303	420.126		421.945	419.759		-4.95553	-4.76865	416.41	2021	415.17	1964	3	1964.2	320.74	319.41	319.495	34.45	0.00731023	1986.12	347.513	346.98		1986.12	343.487
World	OWID_WRL	2022	37293834000	302100000	426.798		426.991		427.184		9.15108	0.434907	425.221	423.014		424.854	422.637		424.487	422.262		-4.79725	-5.25378	418.53	2022	417.84	1964	4	1964.29	321.84	319.45	319.572	34.4	0.0149219	1986.21	347.646	346.93		1986.21	343.641
World	OWID_WRL	2023	37791570000	497736000	429.667		429.865		430.063		10.7253	0.438477	427.781	425.534		427.404	425.149		427.029	424.764		-6.00857	-5.32998	421.08	2023	419.14	1964	5	1964.37	322.26	319.4	319.647	34.75	0.0607842	1986.29	347.78	347.29		1986.29	343.796
		2024	38169485700	377915700	432.575		432.778		432.981		10.278	0.439924	430.365	428.079		429.979	427.684		429.595	427.291		-5.1841	-5.59634	424.61	2024	422.5	1964	6	1964.46	321.89	319.75	319.724	34.77	0.000698684	1986.38	347.914	347.42		1986.38	343.95
																							-5.1841		2025	426.34	1964	7	1964.54	320.44	319.77	319.798	35	0.000801656	1986.46	348.048	347.61		1986.46	344.105
																											1964	8	1964.62	318.69	320	319.876	34.66	0.0154491	1986.54	348.182	347.43		1986.54	344.259
																											1964	9	1964.71	316.7	319.66	319.953	34.91	0.0860169	1986.62	348.316	347.51		1986.62	344.413
																											1964	10	1964.79	316.87	319.91	320.028	34.58	0.0140379	1986.71	348.45	348.62		1986.71	344.568
																											1964	11	1964.87	317.68	319.58	320.106	34.49	0.277133	1986.79	348.584	348.04		1986.79	344.722
																											1964	12	1964.96	318.71	319.49	320.182	34.4	0.478978	1986.88	348.717	348.28		1986.88	344.877
																											1965	1	1965.04	319.44	319.4	320.261	34.81	0.740463	1986.96	348.851	348.36		1986.96	345.031
																											1965	2	1965.13	320.44	319.81	320.339	34.59	0.280057	1987.04	348.985	348.66		1987.04	345.186
																											1965	3	1965.2	320.89	319.59	320.41	34.78	0.673172	1987.12	349.119	348.24		1987.12	345.34
																											1965	4	1965.29	322.14	319.78	320.49	34.3	0.503578	1987.21	349.253	348.39		1987.21	345.494
																											1965	5	1965.37	322.17	319.3	320.566	34.7	1.60369	1987.29	349.387	348.84		1987.29	345.649
																											1965	6	1965.45	321.87	319.7	320.646	35.51	0.894574	1987.38	349.52	349.09		1987.38	345.803
																											1965	7	1965.54	321.21	320.51	320.723	35.15	0.0453376	1987.46	349.654	349.29		1987.46	345.958
																											1965	8	1965.62	318.87	320.15	320.803	35.77	0.426092	1987.54	349.788	349.51		1987.54	346.112
																											1965	9	1965.71	317.81	320.77	320.883	35.36	0.01272	1987.62	349.922	349.65		1987.62	346.267
																											1965	10	1965.79	317.3	320.36	320.96	35.78	0.36054	1987.71	350.056	349.85		1987.71	346.421
																											1965	11	1965.87	318.87	320.78	321.041	35.2	0.0680974	1987.79	350.19	349.96		1987.79	346.576
																											1965	12	1965.96	319.42	320.2	321.119	35.59	0.844552	1987.88	350.324	350.15		1987.88	346.73
																											1966	1	1966.04	320.62	320.59	321.2	35.96	0.371846	1987.96	350.457	350.14		1987.96	346.884
																											1966	2	1966.13	321.6	320.96	321.281	36.08	0.102904	1988.04	350.591	350.49		1988.04	347.039
																											1966	3	1966.2	322.39	321.08	321.354	36.34	0.075146	1988.12	350.725	351		1988.12	347.193
																											1966	4	1966.29	323.7	321.34	321.436	36.2	0.0091383	1988.21	350.859	350.99		1988.21	347.348
																											1966	5	1966.37	324.08	321.2	321.515	36.57	0.0989523	1988.29	350.993	351.03		1988.29	347.502
																											1966	6	1966.45	323.75	321.57	321.596	36.68	0.000693215	1988.38	351.127	351.22		1988.38	347.657
																											1966	7	1966.54	322.38	321.68	321.676	36.65	1.86538e-05	1988.46	351.261	351.55		1988.46	347.811
																											1966	8	1966.62	320.36	321.65	321.758	36.6	0.0116286	1988.54	351.395	352.15		1988.54	347.965
																											1966	9	1966.71	318.64	321.6	321.84	36.17	0.0576921	1988.62	351.528	352.01		1988.62	348.12
																											1966	10	1966.79	318.1	321.17	321.92	36.7	0.56268	1988.71	351.662	352.18		1988.71	348.274
																											1966	11	1966.87	319.78	321.7	322.003	36.81	0.0917902	1988.79	351.796	352.62		1988.79	348.429
																											1966	12	1966.96	321.03	321.81	322.083	37.29	0.0746828	1988.88	351.93	352.53		1988.88	348.583
																											1967	1	1967.04	322.33	322.29	322.166	36.86	0.0152693	1988.96	352.064	352.52		1988.96	348.738
																											1967	2	1967.13	322.5	321.86	322.25	36.73	0.151931	1989.04	352.198	352.99		1989.04	348.892
																											1967	3	1967.2	323.04	321.73	322.325	37.04	0.354335	1989.12	352.331	352.69		1989.12	349.046
																											1967	4	1967.29	324.42	322.04	322.409	37.12	0.136234	1989.21	352.465	352.6		1989.21	349.201
																											1967	5	1967.37	325	322.12	322.49	36.91	0.137174	1989.29	352.599	353.07		1989.29	349.355
																											1967	6	1967.45	324.09	321.91	322.575	36.84	0.441578	1989.38	352.733	352.78		1989.38	349.51
																											1967	7	1967.54	322.54	321.84	322.656	37.21	0.666143	1989.46	352.867	353.06		1989.46	349.664
																											1967	8	1967.62	320.92	322.21	322.741	37.23	0.281667	1989.54	353.001	353.38		1989.54	349.819
																											1967	9	1967.71	319.25	322.23	322.825	37.47	0.354592	1989.62	353.135	353.43		1989.62	349.973
																											1967	10	1967.79	319.39	322.47	322.908	37.65	0.191609	1989.71	353.268	353.37		1989.71	350.127
																											1967	11	1967.87	320.73	322.65	322.993	37.75	0.117644	1989.79	353.402	353.57		1989.79	350.282
																											1967	12	1967.96	321.96	322.75	323.076	37.54	0.106044	1989.88	353.536	353.68		1989.88	350.436
																											1968	1	1968.04	322.57	322.54	323.161	37.51	0.385782	1989.96	353.67	353.84		1989.96	350.591
																											1968	2	1968.13	323.15	322.51	323.247	37.55	0.542713	1990.04	353.804	353.78		1990.04	350.745
																											1968	3	1968.2	323.89	322.55	323.327	37.62	0.603571	1991	355.343			1991	352.521
																											1968	4	1968.29	325.02	322.62	323.413	37.68	0.628657	1992	356.95		2.5752	1992	354.374
																											1968	5	1968.37	325.57	322.68	323.496	38.19	0.666375	1993	358.556		2.3283	1993	356.228		2.3283
																											1968	6	1968.46	325.36	323.19	323.583	38.46	0.154221	1994	360.162		2.0814	1994	358.081
																											1968	7	1968.54	324.14	323.46	323.667	38.43	0.0426626	1995.04	361.835			1995.04	360.011	359.91
																											1968	8	1968.62	322.11	323.43	323.753	38.32	0.104559	1995.12	361.969			1995.12	360.166	360.18
																											1968	9	1968.71	320.33	323.32	323.84	38.33	0.27079	1995.21	362.103			1995.21	360.32	360.37
																											1968	10	1968.79	320.25	323.33	323.925	38.25	0.353689	1995.29	362.237			1995.29	360.475	360.76
																											1968	11	1968.87	321.32	323.25	324.012	38.69	0.580877	1995.38	362.371			1995.38	360.629	360.72
																											1968	12	1968.96	322.89	323.69	324.097	38.97	0.165652	1995.46	362.505			1995.46	360.783	360.98
																											1969	1	1969.04	324	323.97	324.185	38.77	0.0462086	1995.54	362.639			1995.54	360.938	361.1		1.76
																											1969	2	1969.13	324.42	323.77	324.273	39.31	0.253249	1995.62	362.772			1995.62	361.092	360.93		2.19
																											1969	3	1969.2	325.63	324.31	324.353	39.27	0.00186405	1995.71	362.906			1995.71	361.247	361.71		2.16
																											1969	4	1969.29	326.66	324.27	324.442	39.48	0.0295725	1995.79	363.04			1995.79	361.401	361.52		2.03667
																											1969	5	1969.37	327.38	324.48	324.528	39.51	0.00230781	1995.88	363.174			1995.88	361.556	361.75
																											1969	6	1969.45	326.71	324.51	324.617	40.17	0.0114819	1995.96	363.308			1995.96	361.71	361.67
																											1969	7	1969.54	325.88	325.17	324.704	39.97	0.217491	1996.04	363.442			1996.04	361.864	361.98
																											1969	8	1969.62	323.66	324.97	324.793	40.37	0.0312644	1996.12	363.576			1996.12	362.019	362.47
																											1969	9	1969.71	322.38	325.37	324.883	39.88	0.237224	1996.21	363.709			1996.21	362.173	362.64
																											1969	10	1969.79	321.78	324.88	324.97	39.79	0.00811046	1996.29	363.843			1996.29	362.328	361.99
																											1969	11	1969.87	322.86	324.79	325.06	39.91	0.0730927	1996.38	363.977			1996.38	362.482	362.23
																											1969	12	1969.96	324.12	324.91	325.148	40.03	0.0565919	1996.46	364.111			1996.46	362.637	362.82
																											1970	1	1970.04	325.06	325.03	325.239	40.34	0.0434791	1996.54	364.245			1996.54	362.791	362.98
																											1970	2	1970.13	325.98	325.34	325.329	40.61	0.000113133	1996.62	364.379			1996.62	362.945	363.13
																											1970	3	1970.2	326.93	325.61	325.412	40.74	0.0393519	1996.71	364.513			1996.71	363.1	363.14
																											1970	4	1970.29	328.13	325.74	325.503	40.16	0.0561671	1996.79	364.647			1996.79	363.254	363.12
																											1970	5	1970.37	328.08	325.16	325.592	40.46	0.186264	1996.88	364.78			1996.88	363.409	363.18
																											1970	6	1970.45	327.67	325.46	325.683	40.63	0.0498592	1996.96	364.914			1996.96	363.563	363.23
																											1970	7	1970.54	326.34	325.63	325.772	40.99	0.0202484	1997.04	365.048			1997.04	363.718	363.03
																											1970	8	1970.62	324.69	325.99	325.864	41.1	0.0157638	1997.12	365.182			1997.12	363.872	363.4
																											1970	9	1970.71	323.1	326.1	325.957	41.18	0.0205004	1997.21	365.316			1997.21	364.026	363.02
																											1970	10	1970.79	323.06	326.18	326.046	40.95	0.0178299	1997.29	365.45			1997.29	364.181	363.82
																											1970	11	1970.87	324.01	325.95	326.139	40.93	0.035872	1997.38	365.583			1997.38	364.335	363.87
																											1970	12	1970.96	325.13	325.93	326.229	41.14	0.0896892	1997.46	365.717			1997.46	364.49	363.56
																											1971	1	1971.04	326.17	326.14	326.323	41.03	0.0333962	1997.54	365.851			1997.54	364.644	363.74
																											1971	2	1971.13	326.68	326.03	326.416	40.85	0.14918	1997.62	365.985			1997.62	364.799	363.98
																											1971	3	1971.2	327.17	325.85	326.501	40.38	0.423667	1997.71	366.119			1997.71	364.953	363.83
																											1971	4	1971.29	327.79	325.38	326.595	41	1.47607	1997.79	366.253			1997.79	365.108	364.28
																											1971	5	1971.37	328.93	326	326.686	41.36	0.470723	1997.88	366.387			1997.88	365.262	364.71
																											1971	6	1971.45	328.57	326.36	326.78	41.65	0.176796	1997.96	366.52			1997.96	365.416	365.28
																											1971	7	1971.54	327.36	326.65	326.872	41.74	0.0493142	1998.04	366.654			1998.04	365.571	365.19
																											1971	8	1971.62	325.43	326.74	326.967	41.37	0.0514837	1998.12	366.788			1998.12	365.725	365.29
																											1971	9	1971.71	323.36	326.37	327.062	41.69	0.478814	1998.21	366.922			1998.21	365.88	365.73
																											1971	10	1971.79	323.56	326.69	327.154	41.75	0.215505	1998.29	367.056			1998.29	366.034	366.17
																											1971	11	1971.87	324.8	326.75	327.25	41.82	0.249859	1998.38	367.19			1998.38	366.189	366.68
																											1971	12	1971.96	326.01	326.82	327.343	41.73	0.273073	1998.46	367.324			1998.46	366.343	366.95
																											1972	1	1972.04	326.77	326.73	327.438	41.98	0.501874	1998.54	367.458			1998.54	366.497	367.29
																											1972	2	1972.13	327.63	326.98	327.534	41.39	0.307379	1998.62	367.591			1998.62	366.652	367.69
																											1972	3	1972.2	327.75	326.39	327.624	42.29	1.5237	1998.71	367.725			1998.71	366.806	367.51
																											1972	4	1972.29	329.72	327.29	327.721	42.14	0.185609	1998.79	367.859			1998.79	366.961	367.82
																											1972	5	1972.37	330.07	327.14	327.814	41.88	0.454832	1998.88	367.993			1998.88	367.115	367.7
																											1972	6	1972.46	329.09	326.88	327.911	42.36	1.06361	1998.96	368.127			1998.96	367.27	368.05
																											1972	7	1972.54	328.04	327.36	328.005	42.67	0.41648	1999.04	368.261			1999.04	367.424	368.13
																											1972	8	1972.62	326.32	327.67	328.103	42.87	0.187246	1999.12	368.394			1999.12	367.578	368.46
																											1972	9	1972.71	324.84	327.87	328.2	43.33	0.109113	1999.21	368.528			1999.21	367.733	368.24
																											1972	10	1972.79	325.2	328.33	328.295	43.45	0.00123016	1999.29	368.662			1999.29	367.887	368.62
																											1972	11	1972.87	326.5	328.45	328.393	43.36	0.00324922	1999.38	368.796			1999.38	368.042	368.31
																											1972	12	1972.96	327.55	328.36	328.488	43.51	0.0164278	1999.46	368.93			1999.46	368.196	368.29
																											1973	1	1973.04	328.55	328.51	328.587	43.91	0.00590275	1999.54	369.064			1999.54	368.351	368.93
																											1973	2	1973.13	329.56	328.91	328.686	43.96	0.0502454	1999.62	369.198			1999.62	368.505	368.63
																											1973	3	1973.2	330.3	328.96	328.776	44.08	0.0340384	1999.71	369.331			1999.71	368.659	368.28
																											1973	4	1973.29	331.5	329.08	328.875	44.54	0.0419847	1999.79	369.465			1999.79	368.814	368.8
																											1973	5	1973.37	332.48	329.54	328.972	44.84	0.323031	1999.88	369.599			1999.88	368.968	368.86
																											1973	6	1973.45	332.07	329.84	329.072	45.15	0.590444	1999.96	369.733			1999.96	369.123	368.93
																											1973	7	1973.54	330.87	330.15	329.169	45.63	0.963137	2000.04	369.867			2000.04	369.277	369.24
																											1973	8	1973.62	329.31	330.63	329.269	45.55	1.85221	2000.12	370.001			2000.12	369.432	368.99
																											1973	9	1973.71	327.51	330.55	329.37	45.32	1.39306	2000.21	370.135			2000.21	369.586	369.24
																											1973	10	1973.79	327.18	330.32	329.467	45.13	0.726872	2000.29	370.269			2000.29	369.741	369.44
																											1973	11	1973.87	328.16	330.13	329.569	44.45	0.315041	2000.38	370.402			2000.38	369.895	368.87
																											1973	12	1973.96	328.64	329.45	329.667	44.32	0.0470445	2000.46	370.536			2000.46	370.049	369.66
																											1974	1	1974.04	329.35	329.32	329.769	45.05	0.201195	2000.54	370.67			2000.54	370.204	369.36
																											1974	2	1974.13	330.71	330.05	329.87	45.14	0.0322394	2000.62	370.804			2000.62	370.358	369.87
																											1974	3	1974.2	331.48	330.14	329.963	45.22	0.0314292	2000.71	370.938			2000.71	370.513	370.46
																											1974	4	1974.29	332.65	330.22	330.065	45.22	0.0239599	2000.79	371.072			2000.79	370.667	370.42
																											1974	5	1974.38	333.19	330.22	330.171	44.79	0.00242684	2000.88	371.206			2000.88	370.822	370.48
																											1974	6	1974.46	332.2	329.79	330.272	45.21	0.232011	2000.96	371.339			2000.96	370.976	370.46
																											1974	7	1974.54	331.07	330.21	330.373	45.54	0.0265616	2001.04	371.473			2001.04	371.13	370.6
																											1974	8	1974.62	329.15	330.54	330.474	45.44	0.00430334	2001.12	371.607			2001.12	371.285	370.95
																											1974	9	1974.71	327.33	330.44	330.576	45.53	0.0185138	2001.21	371.741			2001.21	371.439	371.06
																											1974	10	1974.79	327.28	330.53	330.678	45.5	0.0219327	2001.29	371.875			2001.29	371.594	370.99
																											1974	11	1974.88	328.31	330.5	330.78	45.54	0.07854	2001.38	372.009			2001.38	371.748	371.11
																											1974	12	1974.96	329.58	330.54	330.883	45.84	0.117407	2001.46	372.142			2001.46	371.903	371.17
																											1975	1	1975.04	330.73	330.84	330.985	45.85	0.0211451	2001.54	372.276			2001.54	372.057	371.08
																											1975	2	1975.12	331.46	330.85	331.088	45.37	0.0567878	2001.62	372.41			2001.62	372.211	371.39
																											1975	3	1975.21	331.94	330.37	331.191	45.53	0.674759	2001.71	372.544			2001.71	372.366	371.61
																											1975	4	1975.29	333.11	330.53	331.295	45.98	0.585138	2001.79	372.678			2001.79	372.52	371.85
																											1975	5	1975.38	333.95	330.98	331.399	46.01	0.175203	2001.88	372.812			2001.88	372.675	371.92
																											1975	6	1975.46	333.42	331.01	331.502	46.12	0.242507	2001.96	372.946			2001.96	372.829	372.09
																											1975	7	1975.54	331.97	331.12	331.607	46.33	0.236878	2002.04	373.08			2002.04	372.984	372.48
																											1975	8	1975.62	329.95	331.33	331.711	46.6	0.14522	2002.12	373.213			2002.12	373.138	372.49
																											1975	9	1975.71	328.5	331.6	331.816	46.62	0.0465275	2002.21	373.347			2002.21	373.292	372.61
																											1975	10	1975.79	328.36	331.62	331.921	46.57	0.0904231	2002.29	373.481			2002.29	373.447	372.54
																											1975	11	1975.88	329.38	331.57	332.026	46.74	0.207782	2002.38	373.615			2002.38	373.601	372.98
																											1975	12	1975.96	330.78	331.74	332.131	46.67	0.153046	2002.46	373.749			2002.46	373.756	373.46
																											1976	1	1976.04	331.56	331.67	332.237	47.14	0.321453	2002.54	373.883			2002.54	373.91	373.58
																											1976	2	1976.12	332.74	332.14	332.343	46.78	0.0411493	2002.62	374.017			2002.62	374.065	373.7
																											1976	3	1976.21	333.36	331.78	332.449	47.16	0.447549	2002.71	374.15			2002.71	374.219	374.29
																											1976	4	1976.29	334.74	332.16	332.556	46.75	0.156428	2002.79	374.284			2002.79	374.374	374.06
																											1976	5	1976.38	334.72	331.75	332.662	46.56	0.83203	2002.88	374.418			2002.88	374.528	374.52
																											1976	6	1976.46	333.98	331.56	332.769	47.23	1.46182	2002.96	374.552			2002.96	374.682	374.72
																											1976	7	1976.54	333.08	332.23	332.876	47.07	0.417763	2003.04	374.686			2003.04	374.837	374.82
																											1976	8	1976.62	330.68	332.07	332.984	47.07	0.834958	2003.12	374.82			2003.12	374.991	374.95
																											1976	9	1976.71	328.96	332.07	333.091	46.98	1.04332	2003.21	374.953			2003.21	375.146	374.99
																											1976	10	1976.79	328.72	331.98	333.199	47.35	1.48716	2003.29	375.087			2003.29	375.3	375.24
																											1976	11	1976.88	330.16	332.35	333.308	47.59	0.91715	2003.38	375.221			2003.38	375.455	375.73
																											1976	12	1976.96	331.62	332.59	333.416	47.77	0.682485	2003.46	375.355			2003.46	375.609	376.21
																											1977	1	1977.04	332.68	332.77	333.525	47.58	0.569971	2003.54	375.489			2003.54	375.763	376.37
																											1977	2	1977.12	333.17	332.58	333.634	48.4	1.11077	2003.62	375.623			2003.62	375.918	376.27
																											1977	3	1977.21	334.96	333.4	333.743	48.54	0.117758	2003.71	375.757			2003.71	376.072	376.65
																											1977	4	1977.29	336.14	333.54	333.853	49	0.0978315	2003.79	375.891			2003.79	376.227	376.65
																											1977	5	1977.38	336.93	334	333.963	48.79	0.00140385	2003.88	376.024			2003.88	376.381	376.99
																											1977	6	1977.46	336.17	333.79	334.073	49.01	0.0798326	2003.96	376.158			2003.96	376.536	376.93
																											1977	7	1977.54	334.89	334.01	334.183	48.91	0.0299141	2004.04	376.292			2004.04	376.69	376.96
																											1977	8	1977.62	332.56	333.91	334.293	49.36	0.147072	2004.12	376.426			2004.12	376.844	377.19
																											1977	9	1977.71	331.29	334.36	334.404	49.51	0.00196301	2004.21	376.56			2004.21	376.999	377.4
																											1977	10	1977.79	331.28	334.51	334.516	49.68	3.03751e-05	2004.29	376.694			2004.29	377.153	377.8
																											1977	11	1977.88	332.46	334.68	334.627	49.58	0.00282498	2004.38	376.828			2004.38	377.308	377.66
																											1977	12	1977.96	333.6	334.58	334.738	50.01	0.0251077	2004.46	376.961			2004.46	377.462	377.57
																											1978	1	1978.04	334.94	335.01	334.85	49.6	0.0254529	2004.54	377.095			2004.54	377.617	377.12
																											1978	2	1978.12	335.26	334.6	334.963	50	0.131479	2004.62	377.229			2004.62	377.771	377.9
																											1978	3	1978.21	336.66	335	335.075	50.07	0.00562627	2004.71	377.363			2004.71	377.925	377.8
																											1978	4	1978.29	337.69	335.07	335.188	50.08	0.0138818	2004.79	377.497			2004.79	378.08	378
																											1978	5	1978.38	338.02	335.08	335.301	50.6	0.0487388	2004.88	377.631			2004.88	378.234	378.49
																											1978	6	1978.46	338.01	335.6	335.414	50.65	0.0346011	2004.96	377.765			2004.96	378.389	378.48
																											1978	7	1978.54	336.5	335.65	335.528	50.87	0.014979	2005.04	377.898			2005.04	378.543	378.37
																											1978	8	1978.62	334.42	335.87	335.641	50.51	0.0522707
																											1978	9	1978.71	332.36	335.51	335.755	50.72	0.0602236
																											1978	10	1978.79	332.45	335.72	335.87	50.99	0.0224545
																											1978	11	1978.88	333.76	335.99	335.984	50.87	3.10456e-05
																											1978	12	1978.96	334.91	335.87	336.099	51.22	0.0525703
																											1979	1	1979.04	336.14	336.22	336.215	51	2.97068e-05
																											1979	2	1979.12	336.69	336	336.33	51.56	0.10887
																											1979	3	1979.21	338.27	336.56	336.446	51.11	0.0130792
																											1979	4	1979.29	338.82	336.11	336.562	51.24	0.204063
																											1979	5	1979.38	339.24	336.24	336.678	51.83	0.191817
																											1979	6	1979.46	339.26	336.83	336.794	51.69	0.00126145
																											1979	7	1979.54	337.54	336.69	336.911	52.2	0.0490252
																											1979	8	1979.62	335.72	337.2	337.028	52.19	0.0294159
																											1979	9	1979.71	333.97	337.19	337.146	52.57	0.00194989
																											1979	10	1979.79	334.24	337.57	337.264	52.59	0.09387
																											1979	11	1979.88	335.32	337.59	337.382	52.83	0.0434582
																											1979	12	1979.96	336.81	337.83	337.5	53.13	0.109077
																											1980	1	1980.04	337.9	338.13	337.618	52.85	0.26178
																											1980	2	1980.12	338.34	337.85	337.737	53.51	0.0127418
																											1980	3	1980.21	340.07	338.51	337.856	53.31	0.427494
																											1980	4	1980.29	340.93	338.31	337.976	53.4	0.111792
																											1980	5	1980.38	341.45	338.4	338.095	53.85	0.0928618
																											1980	6	1980.46	341.36	338.85	338.215	53.56	0.403004
																											1980	7	1980.54	339.45	338.56	338.336	54.07	0.0503948
																											1980	8	1980.62	337.67	339.07	338.456	54.38	0.377004
																											1980	9	1980.71	336.25	339.38	338.577	54.4	0.645189
																											1980	10	1980.79	336.14	339.4	338.698	54.46	0.492849
																											1980	11	1980.88	337.3	339.46	338.819	54.26	0.410474
																											1980	12	1980.96	338.29	339.26	338.941	54.42	0.101788
																											1981	1	1981.04	339.29	339.42	339.063	54.98	0.127425
																											1981	2	1981.12	340.55	339.98	339.185	55.08	0.631616
																											1981	3	1981.21	341.63	340.08	339.308	54.98	0.596335
																											1981	4	1981.29	342.6	339.98	339.431	54.97	0.301699
																											1981	5	1981.38	343.04	339.97	339.554	55.06	0.173196
																											1981	6	1981.46	342.54	340.06	339.677	54.92	0.146513
																											1981	7	1981.54	340.82	339.92	339.801	54.87	0.014144
																											1981	8	1981.62	338.48	339.87	339.925	55.17	0.00303171
																											1981	9	1981.71	336.95	340.17	340.049	55.39	0.0145571
																											1981	10	1981.79	337.05	340.39	340.174	55.75	0.0466211
																											1981	11	1981.88	338.57	340.75	340.299	55.85	0.203434
																											1981	12	1981.96	339.91	340.85	340.424	56.09	0.181353
																											1982	1	1982.04	340.93	341.09	340.55	56.16	0.291842
																											1982	2	1982.12	341.76	341.16	340.676	56.18	0.234684
																											1982	3	1982.21	342.78	341.18	340.802	56.32	0.143156
																											1982	4	1982.29	343.96	341.32	340.928	56.67	0.153526
																											1982	5	1982.38	344.77	341.67	341.055	56.43	0.378393
																											1982	6	1982.46	343.88	341.43	341.182	56.61	0.0615763
																											1982	7	1982.54	342.42	341.61	341.309	56.64	0.0904194
																											1982	8	1982.62	340.24	341.64	341.437	56.56	0.041249
																											1982	9	1982.71	338.38	341.56	341.565	56.77	2.31011e-05
																											1982	10	1982.79	338.41	341.77	341.693	56.59	0.00590261
																											1982	11	1982.88	339.44	341.59	341.822	56.71	0.0536802
																											1982	12	1982.96	340.78	341.71	341.951	56.75	0.0578479
																											1983	1	1983.04	341.57	341.75	342.08	57.25	0.108772
																											1983	2	1983.12	342.79	342.25	342.209	56.85	0.00166062
																											1983	3	1983.21	343.37	341.85	342.339	57.76	0.239124
																											1983	4	1983.29	345.39	342.76	342.469	57.97	0.084551
																											1983	5	1983.38	346.14	342.97	342.6	58.3	0.137197
																											1983	6	1983.46	345.76	343.3	342.73	58.56	0.324573
																											1983	7	1983.54	344.32	343.56	342.861	58.89	0.487978
																											1983	8	1983.62	342.51	343.89	342.993	58.59	0.805039
																											1983	9	1983.71	340.46	343.59	343.124	58.86	0.216793
																											1983	10	1983.79	340.53	343.86	343.256	58.92	0.364222
																											1983	11	1983.88	341.79	343.92	343.389	59.12	0.282224
																											1983	12	1983.96	343.2	344.12	343.521	59.32	0.358407
																											1984	1	1984.04	344.21	344.32	343.654	59.39	0.443046
																											1984	2	1984.12	344.92	344.39	343.788	59.26	0.362891
																											1984	3	1984.21	345.68	344.26	343.921	59.75	0.114835
																											1984	4	1984.29	347.38	344.75	344.055	59.59	0.482832
																											1984	5	1984.38	347.78	344.59	344.189	59.73	0.160552
																											1984	6	1984.46	347.16	344.73	344.324	60.02	0.164995
																											1984	7	1984.54	345.79	345.02	344.459	60.12	0.314967
																											1984	8	1984.62	343.74	345.12	344.594	59.76	0.276761
																											1984	9	1984.71	341.59	344.76	344.729	60.19	0.000937542
																											1984	10	1984.79	341.86	345.19	344.865	60.41	0.105411
																											1984	11	1984.88	343.31	345.41	345.001	60.88	0.166921
																											1984	12	1984.96	345	345.88	345.138	60.59	0.550745
																											1985	1	1985.04	345.48	345.59	345.275	60.92	0.0993475
																											1985	2	1985.12	346.41	345.92	345.412	61.56	0.258169
																											1985	3	1985.21	347.91	346.56	345.549	61.08	1.02148
																											1985	4	1985.29	348.66	346.08	345.687	61.12	0.154268
																											1985	5	1985.38	349.28	346.12	345.825	61.23	0.086843
																											1985	6	1985.46	348.65	346.23	345.964	61.08	0.0709064
																											1985	7	1985.54	346.9	346.08	346.103	61.57	0.000511867
																											1985	8	1985.62	345.26	346.57	346.242	61.59	0.107783
																											1985	9	1985.71	343.47	346.59	346.381	61.6	0.0436381
																											1985	10	1985.79	343.35	346.6	346.521	61.82	0.00623942
																											1985	11	1985.88	344.73	346.82	346.661	62.04	0.0252543
																											1985	12	1985.96	346.12	347.04	346.801	61.82	0.0568853
																											1986	1	1986.04	346.78	346.82	346.942	61.98	0.0149838
																											1986	2	1986.12	347.48	346.98	347.083	61.93	0.0107104
																											1986	3	1986.21	348.25	346.93	347.225	62.29	0.0869728
																											1986	4	1986.29	349.86	347.29	347.367	62.42	0.00590451
																											1986	5	1986.38	350.52	347.42	347.509	62.61	0.00791023
																											1986	6	1986.46	349.98	347.61	347.651	62.43	0.00171216
																											1986	7	1986.54	348.25	347.43	347.794	62.51	0.132736
																											1986	8	1986.62	346.17	347.51	347.937	63.62	0.182715
																											1986	9	1986.71	345.48	348.62	348.081	63.04	0.290611
																											1986	10	1986.79	344.82	348.04	348.225	63.28	0.0341868
																											1986	11	1986.88	346.22	348.28	348.369	63.36	0.00792978
																											1986	12	1986.96	347.49	348.36	348.514	63.66	0.0235766
																											1987	1	1987.04	348.73	348.66	348.659	63.24	2.06113e-06
																											1987	2	1987.12	348.92	348.24	348.804	63.39	0.31782
																											1987	3	1987.21	349.81	348.39	348.949	63.84	0.312809
																											1987	4	1987.29	351.4	348.84	349.095	64.09	0.065206
																											1987	5	1987.38	352.15	349.09	349.242	64.29	0.0229797
																											1987	6	1987.46	351.58	349.29	349.388	64.51	0.00963866
																											1987	7	1987.54	350.21	349.51	349.535	64.65	0.000639594
																											1987	8	1987.62	348.2	349.65	349.683	64.85	0.00106141
																											1987	9	1987.71	346.66	349.85	349.83	64.96	0.000391217
																											1987	10	1987.79	346.72	349.96	349.978	65.15	0.000338326
																											1987	11	1987.88	348.08	350.15	350.127	65.14	0.000540876
																											1987	12	1987.96	349.28	350.14	350.275	65.49	0.0183462
																											1988	1	1988.04	350.51	350.49	350.425	66	0.00426569
																											1988	2	1988.12	351.7	351	350.574	65.99	0.181386
																											1988	3	1988.21	352.5	350.99	350.724	66.03	0.0708192
																											1988	4	1988.29	353.67	351.03	350.874	66.22	0.024275
																											1988	5	1988.38	354.35	351.22	351.025	66.55	0.0381462
																											1988	6	1988.46	353.88	351.55	351.176	67.15	0.140218
																											1988	7	1988.54	352.8	352.15	351.327	67.01	0.677427
																											1988	8	1988.62	350.49	352.01	351.479	67.18	0.282473
																											1988	9	1988.71	348.97	352.18	351.63	67.62	0.301996
																											1988	10	1988.79	349.37	352.62	351.783	67.53	0.700661
																											1988	11	1988.88	350.42	352.53	351.936	67.52	0.353295
																											1988	12	1988.96	351.62	352.52	352.089	67.99	0.186064
																											1989	1	1989.04	353.07	352.99	352.242	67.69	0.559155
																											1989	2	1989.12	353.43	352.69	352.396	67.6	0.086435
																											1989	3	1989.21	354.08	352.6	352.55	68.07	0.00248622
																											1989	4	1989.29	355.72	353.07	352.705	67.78	0.13335
																											1989	5	1989.38	355.95	352.78	352.86	68.06	0.0063528
																											1989	6	1989.46	355.44	353.06	353.015	68.38	0.00202944
																											1989	7	1989.54	354.05	353.38	353.171	68.43	0.0437832
																											1989	8	1989.62	351.84	353.43	353.327	68.37	0.0106613
																											1989	9	1989.71	350.09	353.37	353.483	68.57	0.012794
																											1989	10	1989.79	350.33	353.57	353.64	68.68	0.00490522
																											1989	11	1989.88	351.55	353.68	353.797	68.84	0.0137244
																											1989	12	1989.96	352.91	353.84	353.955	68.78	0.0131427
																											1990	1	1990.04	353.86	353.78	354.113	69.37	0.110688
																											1990	2	1990.12	355.1	354.37	354.271	69.27	0.00981217
																											1990	3	1990.21	355.75	354.27	354.43	68.76	0.0254619
																											1990	4	1990.29	356.38	353.76	354.589	69.23	0.686848
																											1990	5	1990.38	357.38	354.23	354.748	69.02	0.268477
																											1990	6	1990.46	356.39	354.02	354.908	69.24	0.788391
																											1990	7	1990.54	354.89	354.24	355.068	69.68	0.686007
																											1990	8	1990.62	353.06	354.68	355.229	69.69	0.301168
																											1990	9	1990.71	351.38	354.69	355.39	69.94	0.489586
																											1990	10	1990.79	351.69	354.94	355.551	70.18	0.373566
																											1990	11	1990.88	353.14	355.18	355.713	70.26	0.283971
																											1990	12	1990.96	354.41	355.26	355.875	69.9	0.378181
																											1991	1	1991.04	354.93	354.9	356.038	70.11	1.29419
																											1991	2	1991.12	355.82	355.11	356.2	70.79
																											1991	3	1991.21	357.33	355.79	356.364	71.13
																											1991	4	1991.29	358.77	356.13	356.528	71.1
																											1991	5	1991.38	359.23	356.1	356.692	70.88
																											1991	6	1991.46	358.23	355.88	356.856	70.69
																											1991	7	1991.54	356.3	355.69	357.021	70.59
																											1991	8	1991.62	353.97	355.59	357.186	70.66
																											1991	9	1991.71	352.34	355.66	357.352	70.69
																											1991	10	1991.79	352.43	355.69	357.518	70.87
																											1991	11	1991.88	353.89	355.87	357.684	71.02
																											1991	12	1991.96	355.21	356.02	357.851	71.29
																											1992	1	1992.04	356.34	356.29	358.019	71.47
																											1992	2	1992.12	357.21	356.47	358.186	71.38
																											1992	3	1992.21	357.97	356.38	358.354	71.51
																											1992	4	1992.29	359.22	356.51	358.523	71.52
																											1992	5	1992.38	359.71	356.52	358.692	72.07
																											1992	6	1992.46	359.44	357.07	358.861	71.58
																											1992	7	1992.54	357.15	356.58	359.031	71.67
																											1992	8	1992.62	354.99	356.67	359.201	71.36
																											1992	9	1992.71	353.01	356.36	359.371	71.72
																											1992	10	1992.79	353.41	356.72	359.542	71.48
																											1992	11	1992.88	354.42	356.48	359.713	71.5
																											1992	12	1992.96	355.68	356.5	359.885	72.06
																											1993	1	1993.04	357.1	357.06	360.057	71.54
																											1993	2	1993.12	357.42	356.54	360.23	71.88
																											1993	3	1993.21	358.59	356.88	360.403	71.71
																											1993	4	1993.29	359.39	356.71	360.576	72.14
																											1993	5	1993.38	360.3	357.14	360.75	72.24
																											1993	6	1993.46	359.64	357.24	360.924	71.87
																											1993	7	1993.54	357.46	356.87	361.099	72.44
																											1993	8	1993.62	355.76	357.44	361.274	72.51
																											1993	9	1993.71	354.14	357.51	361.449	72.61
																											1993	10	1993.79	354.23	357.61	361.625	72.65
																											1993	11	1993.88	355.53	357.65	361.801	72.92
																											1993	12	1993.96	357.03	357.92	361.978	73.25
																											1994	1	1994.04	358.36	358.25	362.155	73.21
																											1994	2	1994.12	359.04	358.21	362.333	73.41
																											1994	3	1994.21	360.11	358.41	362.511	73.59
																											1994	4	1994.29	361.36	358.59	362.689	73.59
																											1994	5	1994.38	361.78	358.59	362.868	73.57
																											1994	6	1994.46	360.94	358.57	363.047	73.91
																											1994	7	1994.54	359.51	358.91	363.227	74.29
																											1994	8	1994.62	357.59	359.29	363.407	74.3
																											1994	9	1994.71	355.86	359.3	363.588	74.63
																											1994	10	1994.79	356.21	359.63	363.769	74.8
																											1994	11	1994.88	357.65	359.8	363.95	74.96
																											1994	12	1994.96	359.1	359.96	364.132	74.91
																											1995	1	1995.04	360.04	359.91	364.314	75.18
																											1995	2	1995.12	361	360.18	364.497	75.37
																											1995	3	1995.21	361.98	360.37	364.68	75.76
																											1995	4	1995.29	363.44	360.76	364.864	75.72
																											1995	5	1995.38	363.83	360.72	365.048	75.98
																											1995	6	1995.46	363.33	360.98	365.232	76.1
																											1995	7	1995.54	361.78	361.1	365.417	75.93
																											1995	8	1995.62	359.33	360.93	365.603	76.71
																											1995	9	1995.71	358.32	361.71	365.788	76.52
																											1995	10	1995.79	358.14	361.52	365.975	76.75
																											1995	11	1995.88	359.61	361.75	366.161	76.67
																											1995	12	1995.96	360.82	361.67	366.349	76.98
																											1996	1	1996.04	362.2	361.98	366.536	77.47
																											1996	2	1996.12	363.36	362.47	366.724	77.64
																											1996	3	1996.21	364.28	362.64	366.913	76.99
																											1996	4	1996.29	364.69	361.99	367.102	77.23
																											1996	5	1996.38	365.25	362.23	367.291	77.82
																											1996	6	1996.46	365.06	362.82	367.481	77.98
																											1996	7	1996.54	363.69	362.98	367.671	78.13
																											1996	8	1996.62	361.55	363.13	367.862	78.14
																											1996	9	1996.71	359.69	363.14	368.053	78.12
																											1996	10	1996.79	359.72	363.12	368.245	78.18
																											1996	11	1996.88	361.04	363.18	368.437	78.23
																											1996	12	1996.96	362.39	363.23	368.63	78.03
																											1997	1	1997.04	363.24	363.03	368.823	78.4
																											1997	2	1997.12	364.21	363.4	369.016	78.02
																											1997	3	1997.21	364.65	363.02	369.21	78.82
																											1997	4	1997.29	366.48	363.82	369.405	78.87
																											1997	5	1997.38	366.77	363.87	369.6	78.56
																											1997	6	1997.46	365.73	363.56	369.795	78.74
																											1997	7	1997.54	364.46	363.74	369.991	78.98
																											1997	8	1997.62	362.4	363.98	370.187	78.83
																											1997	9	1997.71	360.44	363.83	370.384	79.28
																											1997	10	1997.79	360.98	364.28	370.582	79.71
																											1997	11	1997.88	362.65	364.71	370.779	80.28
																											1997	12	1997.96	364.51	365.28	370.977	80.19
																											1998	1	1998.04	365.39	365.19	371.176	80.29
																											1998	2	1998.12	366.1	365.29	371.375	80.73
																											1998	3	1998.21	367.36	365.73	371.575	81.17
																											1998	4	1998.29	368.79	366.17	371.775	81.68
																											1998	5	1998.38	369.56	366.68	371.976	81.95
																											1998	6	1998.46	369.13	366.95	372.177	82.29
																											1998	7	1998.54	367.98	367.29	372.378	82.69
																											1998	8	1998.62	366.1	367.69	372.58	82.51
																											1998	9	1998.71	364.16	367.51	372.783	82.82
																											1998	10	1998.79	364.54	367.82	372.986	82.7
																											1998	11	1998.88	365.67	367.7	373.189	83.05
																											1998	12	1998.96	367.3	368.05	373.393	83.13
																											1999	1	1999.04	368.35	368.13	373.598	83.46
																											1999	2	1999.12	369.28	368.46	373.803	83.24
																											1999	3	1999.21	369.84	368.24	374.008	83.62
																											1999	4	1999.29	371.15	368.62	374.214	83.31
																											1999	5	1999.38	371.12	368.31	374.421	83.29
																											1999	6	1999.46	370.46	368.29	374.627	83.93
																											1999	7	1999.54	369.61	368.93	374.835	83.63
																											1999	8	1999.62	367.06	368.63	375.043	83.28
																											1999	9	1999.71	364.95	368.28	375.251	83.8
																											1999	10	1999.79	365.52	368.8	375.46	83.86
																											1999	11	1999.88	366.88	368.86	375.67	83.93
																											1999	12	1999.96	368.26	368.93	375.88	84.24
																											2000	1	2000.04	369.45	369.24	376.09	83.99
																											2000	2	2000.12	369.71	368.99	376.301	84.24
																											2000	3	2000.21	370.75	369.24	376.512	84.44
																											2000	4	2000.29	371.98	369.44	376.724	83.87
																											2000	5	2000.38	371.75	368.87	376.937	84.66
																											2000	6	2000.46	371.87	369.66	377.15	84.36
																											2000	7	2000.54	370.02	369.36	377.363	84.87
																											2000	8	2000.62	368.27	369.87	377.577	85.46
																											2000	9	2000.71	367.15	370.46	377.792	85.42
																											2000	10	2000.79	367.18	370.42	378.007	85.48
																											2000	11	2000.88	368.53	370.48	378.222	85.46
																											2000	12	2000.96	369.83	370.46	378.438	85.6
																											2001	1	2001.04	370.76	370.6	378.655	85.95
																											2001	2	2001.12	371.69	370.95	378.872	86.06
																											2001	3	2001.21	372.63	371.06	379.089	85.99
																											2001	4	2001.29	373.55	370.99	379.308	86.11
																											2001	5	2001.38	374.03	371.11	379.526	86.17
																											2001	6	2001.46	373.4	371.17	379.745	86.08
																											2001	7	2001.54	371.68	371.08	379.965	86.39
																											2001	8	2001.62	369.78	371.39	380.185	86.61
																											2001	9	2001.71	368.34	371.61	380.406	86.85
																											2001	10	2001.79	368.61	371.85	380.627	86.92
																											2001	11	2001.88	369.94	371.92	380.849	87.09
																											2001	12	2001.96	371.42	372.09	381.071	87.48
																											2002	1	2002.04	372.7	372.48	381.294	87.49
																											2002	2	2002.12	373.37	372.49	381.518	87.61
																											2002	3	2002.21	374.3	372.61	381.742	87.54
																											2002	4	2002.29	375.19	372.54	381.966	87.98
																											2002	5	2002.38	375.93	372.98	382.191	88.46
																											2002	6	2002.46	375.69	373.46	382.417	88.58
																											2002	7	2002.54	374.16	373.58	382.643	88.7
																											2002	8	2002.62	372.03	373.7	382.869	89.29
																											2002	9	2002.71	370.92	374.29	383.097	89.06
																											2002	10	2002.79	370.73	374.06	383.324	89.52
																											2002	11	2002.88	372.43	374.52	383.553	89.72
																											2002	12	2002.96	373.98	374.72	383.781	89.82
																											2003	1	2003.04	375.07	374.82	384.011	89.95
																											2003	2	2003.12	375.82	374.95	384.241	89.99
																											2003	3	2003.21	376.64	374.99	384.471	90.24
																											2003	4	2003.29	377.92	375.24	384.702	90.73
																											2003	5	2003.38	378.78	375.73	384.934	91.21
																											2003	6	2003.46	378.46	376.21	385.166	91.37
																											2003	7	2003.54	376.88	376.37	385.399	91.27
																											2003	8	2003.62	374.57	376.27	385.632	91.65
																											2003	9	2003.71	373.34	376.65	385.865	91.65
																											2003	10	2003.79	373.31	376.65	386.1	91.99
																											2003	11	2003.88	374.84	376.99	386.335	91.93
																											2003	12	2003.96	376.17	376.93	386.57	91.96
																											2004	1	2004.04	377.17	376.96	386.806	92.19
																											2004	2	2004.12	378.05	377.19	387.043	92.4
																											2004	3	2004.21	379.06	377.4	387.28	92.8
																											2004	4	2004.29	380.54	377.8	387.518	92.66
																											2004	5	2004.38	380.8	377.66	387.756	92.57
																											2004	6	2004.46	379.87	377.57	387.995	92.12
																											2004	7	2004.54	377.65	377.12	388.234	92.9
																											2004	8	2004.62	376.17	377.9	388.474	92.8
																											2004	9	2004.71	374.43	377.8	388.715	93
																											2004	10	2004.79	374.63	378	388.956	93.49
																											2004	11	2004.88	376.33	378.49	389.198	93.48
																											2004	12	2004.96	377.68	378.48	389.44	93.37
																											2005	1	2005.04	378.63	378.37	389.683	94.1
																											2005	2	2005.12	379.91	379.1	389.926	94.45
																											2005	3	2005.21	380.95	379.45	390.17	94.84
																											2005	4	2005.29	382.48	379.84	390.415	94.49
																											2005	5	2005.38	382.64	379.49	390.66	95.07
																											2005	6	2005.46	382.4	380.07	390.906	95.38
																											2005	7	2005.54	380.93	380.38	391.153	95.61
																											2005	8	2005.62	378.93	380.61	391.4	95.2
																											2005	9	2005.71	376.89	380.2	391.647	95.5
																											2005	10	2005.79	377.19	380.5	391.896	95.69
																											2005	11	2005.88	378.54	380.69	392.144	96.09
																											2005	12	2005.96	380.31	381.09	392.393	96.33
																											2006	1	2006.04	381.58	381.33	392.644	96.58
																											2006	2	2006.12	382.4	381.58	392.894	96.32
																											2006	3	2006.21	382.86	381.32	393.145	97.11
																											2006	4	2006.29	384.8	382.11	393.397	97.06
																											2006	5	2006.38	385.22	382.06	393.649	96.93
																											2006	6	2006.46	384.24	381.93	393.902	97.1
																											2006	7	2006.54	382.65	382.1	394.156	97.27
																											2006	8	2006.62	380.6	382.27	394.41	97.35
																											2006	9	2006.71	379.04	382.35	394.665	97.66
																											2006	10	2006.79	379.33	382.66	394.921	97.52
																											2006	11	2006.88	380.35	382.52	395.176	97.84
																											2006	12	2006.96	382.02	382.84	395.433	97.88
																											2007	1	2007.04	383.1	382.88	395.69	98.22
																											2007	2	2007.12	384.12	383.22	395.948	98.17
																											2007	3	2007.21	384.81	383.17	396.207	98.95
																											2007	4	2007.29	386.73	383.95	396.466	98.56
																											2007	5	2007.38	386.78	383.56	396.726	99.06
																											2007	6	2007.46	386.33	384.06	396.986	99.25
																											2007	7	2007.54	384.73	384.25	397.247	98.95
																											2007	8	2007.62	382.24	383.95	397.508	99.56
																											2007	9	2007.71	381.2	384.56	397.771	99.72
																											2007	10	2007.79	381.37	384.72	398.034	99.9
																											2007	11	2007.88	382.7	384.9	398.297	100.07
																											2007	12	2007.96	384.19	385.07	398.561	100.54
																											2008	1	2008.04	385.78	385.54	398.826	100.2
																											2008	2	2008.12	386.06	385.2	399.091	99.72
																											2008	3	2008.21	386.28	384.72	399.357	99.71
																											2008	4	2008.29	387.34	384.71	399.624	100.69
																											2008	5	2008.38	388.78	385.69	399.891	100.68
																											2008	6	2008.46	387.99	385.68	400.159	101.04
																											2008	7	2008.54	386.61	386.04	400.428	100.98
																											2008	8	2008.62	384.32	385.98	400.697	101.68
																											2008	9	2008.71	383.41	386.68	400.967	101.49
																											2008	10	2008.79	383.21	386.49	401.237	101.59
																											2008	11	2008.88	384.41	386.59	401.508	101.64
																											2008	12	2008.96	385.79	386.64	401.78	101.86
																											2009	1	2009.04	387.17	386.86	402.053	101.81
																											2009	2	2009.12	387.7	386.81	402.326	102.54
																											2009	3	2009.21	389.04	387.54	402.599	102.15
																											2009	4	2009.29	389.76	387.15	402.874	102.24
																											2009	5	2009.38	390.36	387.24	403.149	102.46
																											2009	6	2009.46	389.7	387.46	403.425	102.77
																											2009	7	2009.54	388.24	387.77	403.701	102.99
																											2009	8	2009.62	386.29	387.99	403.978	103.22
																											2009	9	2009.71	384.95	388.22	404.256	102.88
																											2009	10	2009.79	384.64	387.88	404.534	103.36
																											2009	11	2009.88	386.23	388.36	404.813	103.43
																											2009	12	2009.96	387.63	388.43	405.093	103.62
																											2010	1	2010.04	388.91	388.62	405.373	104.47
																											2010	2	2010.12	390.41	389.47	405.654	104.85
																											2010	3	2010.21	391.37	389.85	405.936	105.12
																											2010	4	2010.29	392.67	390.12	406.219	105.09
																											2010	5	2010.38	393.21	390.09	406.502	105.1
																											2010	6	2010.46	392.38	390.1	406.785	104.93
																											2010	7	2010.54	390.41	389.93	407.07	105.21
																											2010	8	2010.62	388.54	390.21	407.355	105.32
																											2010	9	2010.71	387.03	390.32	407.641	105.72
																											2010	10	2010.79	387.43	390.72	407.927	105.99
																											2010	11	2010.88	388.87	390.99	408.214	105.8
																											2010	12	2010.96	389.99	390.8	408.502	106.19
																											2011	1	2011.04	391.5	391.19	408.791	106.12
																											2011	2	2011.12	392.05	391.12	409.08	106.27
																											2011	3	2011.21	392.8	391.27	409.37	105.83
																											2011	4	2011.29	393.44	390.83	409.661	106.24
																											2011	5	2011.38	394.41	391.24	409.952	106.64
																											2011	6	2011.46	393.95	391.64	410.244	107.25
																											2011	7	2011.54	392.72	392.25	410.537	107.04
																											2011	8	2011.62	390.33	392.04	410.83	107.6
																											2011	9	2011.71	389.28	392.6	411.124	107.53
																											2011	10	2011.79	389.19	392.53	411.419	107.64
																											2011	11	2011.88	390.48	392.64	411.715	107.86
																											2011	12	2011.96	392.06	392.86	412.011	108.07
																											2012	1	2012.04	393.31	393.07	412.308	108.2
																											2012	2	2012.12	394.04	393.2	412.605	107.99
																											2012	3	2012.21	394.59	392.99	412.904	108.65
																											2012	4	2012.29	396.38	393.65	413.203	108.73
																											2012	5	2012.38	396.93	393.73	413.503	108.63
																											2012	6	2012.46	395.91	393.63	413.803	109.12
																											2012	7	2012.54	394.56	394.12	414.104	109.37
																											2012	8	2012.62	392.59	394.37	414.406	109.74
																											2012	9	2012.71	391.32	394.74	414.709	109.64
																											2012	10	2012.79	391.27	394.64	415.013	110.25
																											2012	11	2012.88	393.2	395.25	415.317	110.27
																											2012	12	2012.96	394.57	395.27	415.621	110.62
																											2013	1	2013.04	395.78	395.62	415.927	111.23
																											2013	2	2013.12	397.03	396.23	416.233	111.07
																											2013	3	2013.21	397.66	396.07	416.54	110.79
																											2013	4	2013.29	398.64	395.79	416.848	111.64
																											2013	5	2013.38	400.02	396.64	417.157	111.48
																											2013	6	2013.46	398.81	396.48	417.466	112.12
																											2013	7	2013.54	397.51	397.12	417.776	112.27
																											2013	8	2013.62	395.39	397.27	418.087	112.24
																											2013	9	2013.71	393.72	397.24	418.398	112.25
																											2013	10	2013.79	393.9	397.25	418.711	112.35
																											2013	11	2013.88	395.36	397.35	419.023	112.78
																											2013	12	2013.96	397.03	397.78	419.337	112.74
																											2014	1	2014.04	398.04	397.74	419.652	112.45
																											2014	2	2014.12	398.27	397.45	419.967	113.37
																											2014	3	2014.21	399.91	398.37	420.283	113.63
																											2014	4	2014.29	401.51	398.63	420.6	113.56
																											2014	5	2014.38	401.96	398.56	420.917	114.1
																											2014	6	2014.46	401.43	399.1	421.235	113.85
																											2014	7	2014.54	399.27	398.85	421.555	114.07
																											2014	8	2014.62	397.18	399.07	421.874	114.11
																											2014	9	2014.71	395.54	399.11	422.195	114.58
																											2014	10	2014.79	396.16	399.58	422.516	114.49
																											2014	11	2014.88	397.4	399.49	422.838	114.81
																											2014	12	2014.96	399.08	399.81	423.161	114.92
																											2015	1	2015.04	400.18	399.92	423.485	114.77
																											2015	2	2015.12	400.55	399.77	423.809	115.22
																											2015	3	2015.21	401.74	400.22	424.134	115.46
																											2015	4	2015.29	403.34	400.46	424.461	115.7
																											2015	5	2015.38	404.15	400.7	424.787	115.65
																											2015	6	2015.46	402.97	400.65	425.115	116.11
																											2015	7	2015.54	401.46	401.11	425.443	116.04
																											2015	8	2015.62	399.11	401.04	425.772	116.43
																											2015	9	2015.71	397.82	401.43	426.102	116.89
																											2015	10	2015.79	398.49	401.89	426.433	117.24
																											2015	11	2015.88	400.27	402.24	426.764	117.72
																											2015	12	2015.96	402.06	402.72	427.096	117.45
																											2016	1	2016.04	402.73	402.45	427.43	118.4
																											2016	2	2016.12	404.25	403.4	427.763	118.54
																											2016	3	2016.21	405.06	403.54	428.098	119.77
																											2016	4	2016.29	407.6	404.77	428.434	119.41
																											2016	5	2016.38	407.9	404.41	428.77	119.59
																											2016	6	2016.46	406.99	404.59	429.107	119.24
																											2016	7	2016.54	404.59	404.24	429.445	119.41
																											2016	8	2016.62	402.45	404.41	429.784	119.85
																											2016	9	2016.71	401.23	404.85	430.123	120.23
																											2016	10	2016.79	401.79	405.23	430.464	120.74
																											2016	11	2016.88	403.72	405.74	430.804	120.33
																											2016	12	2016.96	404.64	405.33	431.146	121.04
																											2017	1	2017.04	406.36	406.04	431.489	120.8
																											2017	2	2017.12	406.66	405.8	431.833	121.05
																											2017	3	2017.21	407.54	406.05	432.177	121.37
																											2017	4	2017.29	409.22	406.37	432.523	121.37
																											2017	5	2017.38	409.89	406.37	432.869	121.68
																											2017	6	2017.46	409.08	406.68	433.215	122.01
																											2017	7	2017.54	407.33	407.01	433.563	122.31
																											2017	8	2017.62	405.32	407.31	433.912	122.17
																											2017	9	2017.71	403.57	407.17	434.261	122.23
																											2017	10	2017.79	403.82	407.23	434.611	122.36
																											2017	11	2017.88	405.31	407.36	434.962	122.71
																											2017	12	2017.96	407	407.71	435.314	122.82
																											2018	1	2018.04	408.15	407.82	435.667	122.61
																											2018	2	2018.12	408.52	407.61	436.021	123.06
																											2018	3	2018.21	409.59	408.06	436.375	122.65
																											2018	4	2018.29	410.45	407.65	436.73	122.98
																											2018	5	2018.38	411.44	407.98	437.086	123.6
																											2018	6	2018.46	410.99	408.6	437.443	123.59
																											2018	7	2018.54	408.9	408.59	437.801	124.17
																											2018	8	2018.62	407.16	409.17	438.16	124.31
																											2018	9	2018.71	405.71	409.31	438.519	124.56
																											2018	10	2018.79	406.19	409.56	438.88	125.24
																											2018	11	2018.88	408.21	410.24	439.241	124.99
																											2018	12	2018.96	409.27	409.99	439.603	125.69
																											2019	1	2019.04	411.03	410.69	439.967	125.96
																											2019	2	2019.12	411.96	410.96	440.33	125.71
																											2019	3	2019.21	412.18	410.71	440.695	125.92
																											2019	4	2019.29	413.54	410.92	441.061	126.47
																											2019	5	2019.38	414.86	411.47	441.427	126.75
																											2019	6	2019.46	414.16	411.75	441.794	126.65
																											2019	7	2019.54	411.97	411.65	442.163	127.1
																											2019	8	2019.62	410.18	412.1	442.532	127.26
																											2019	9	2019.71	408.76	412.26	442.902	127.1
																											2019	10	2019.79	408.75	412.1	443.273	127.52
																											2019	11	2019.88	410.48	412.52	443.645	127.74
																											2019	12	2019.96	411.98	412.74	444.017	128.26
																											2020	1	2020.04	413.61	413.26	444.391	128.4
																											2020	2	2020.12	414.34	413.4	444.766	128.27
																											2020	3	2020.21	414.74	413.27	445.141	128.74
																											2020	4	2020.29	416.45	413.74	445.517	128.88
																											2020	5	2020.38	417.31	413.88	445.894	129.23
																											2020	6	2020.46	416.6	414.23	446.272	129.31
																											2020	7	2020.54	414.62	414.31	446.652	129.73
																											2020	8	2020.62	412.78	414.73	447.031	130.07
																											2020	9	2020.71	411.52	415.07	447.412	129.86
																											2020	10	2020.79	411.51	414.86	447.794	130.12
																											2020	11	2020.88	413.12	415.12	448.177	129.97
																											2020	12	2020.96	414.26	414.97	448.56	130.17
																											2021	1	2021.04	415.52	415.17	448.945	130.81
																											2021	2	2021.12	416.75	415.81	449.33	131.17
																											2021	3	2021.21	417.64	416.17	449.716	131.34
																											2021	4	2021.29	419.05	416.34	450.104	130.7
																											2021	5	2021.38	419.13	415.7	450.492	131.57
																											2021	6	2021.46	418.94	416.57	450.881	131.65
																											2021	7	2021.54	416.96	416.65	451.271	131.43
																											2021	8	2021.62	414.47	416.43	451.662	131.85
																											2021	9	2021.71	413.3	416.85	452.053	132.28
																											2021	10	2021.79	413.93	417.28	452.447	132.01
																											2021	11	2021.88	415.01	417.01	452.84	132.42
																											2021	12	2021.96	416.71	417.42	453.235	132.84
																											2022	1	2022.04	418.19	417.84	453.631	133.34
																											2022	2	2022.12	419.28	418.34	454.027	132.34
																											2022	3	2022.21	418.81	417.34	454.425	132.52
																											2022	4	2022.29	420.23	417.52	454.823	132.56
																											2022	5	2022.38	420.99	417.56	455.223	133.62
																											2022	6	2022.46	420.99	418.62	455.623	133.59
																											2022	7	2022.54	418.9	418.59	456.025	134.15
																											2022	8	2022.62	417.19	419.15	456.427	134.5
																											2022	9	2022.71	415.95	419.5	456.83	134.13
																											2022	10	2022.79	415.78	419.13	457.235	134.51
																											2022	11	2022.88	417.51	419.51	457.64	134.66
																											2022	12	2022.96	418.95	419.66	458.046	134.14
																											2023	1	2023.04	419.48	419.14	458.453	134.37
																											2023	2	2023.12	420.31	419.37	458.861	134.53
																											2023	3	2023.21	420.99	419.53	459.27	135.82
																											2023	4	2023.29	423.31	420.82	459.681	135.78
																											2023	5	2023.38	424	420.78	460.092	136.25
																											2023	6	2023.46	423.68	421.25	460.503	136.4
																											2023	7	2023.54	421.83	421.4	460.917	136.54
																											2023	8	2023.62	419.68	421.54	461.331	136.91
																											2023	9	2023.71	418.5	421.91	461.746	137.11
																											2023	10	2023.79	418.82	422.11	462.162	137.48
																											2023	11	2023.88	420.46	422.48	462.579	137.57
																											2023	12	2023.96	421.86	422.57	462.997	137.5
																											2024	1	2024.04	422.8	422.5	463.416	138.63
																											2024	2	2024.12	424.55	423.63	463.836	138.91
																											2024	3	2024.21	425.38	423.91	464.257	138.98
																											2024	4	2024.29	426.51	423.98	464.679	138.67
																											2024	5	2024.38	426.9	423.67	465.102	139.5
																											2024	6	2024.46	426.91	424.5	465.526	140.13
																											2024	7	2024.54	425.55	425.13	465.951	139.85
																											2024	8	2024.62	422.99	424.85	466.377	140.45
																											2024	9	2024.71	422.03	425.45	466.804	140.68
																											2024	10	2024.79	422.38	425.68	467.233	140.88
																											2024	11	2024.88	423.85	425.88	467.662	141.12
																											2024	12	2024.96	425.4	426.12	468.092	141.34
																											2025	1	2025.04	426.65	426.34	468.523	141.16
																											2025	2	2025.12	427.09	426.16	468.956	141.67
																											2025	3	2025.21	428.15	426.67	469.389	142.11
																											2025	4	2025.29	429.64	427.11	469.823	-285

## Sheet: Fig 3 data
1500	282.5			1475	282.3
1528	283			1476	282.3
1545	282.6			1477	282.3
1560	281.8			1478	282.3
1570	281.9			1479	282.3
1589	281			1480	282.3
1602	274.2			1481	282.3
1610	271.7			1482	282.3
1628	274.3			1483	282.3
1638	276.6			1484	282.3	282.3
1648	277.2			1485	282.3	282.3
1680	275.8			1486	282.3	282.3
1692	276.3			1487	282.3	282.3
1720	277.5			1488	282.3	282.3
1724	276.9			1489	282.3	282.3
1735	278.1			1490	282.3	282.3
1740	276.7			1491	282.3	282.3
1749	277			1492	282.3	282.3
				1493	282.3	282.3
				1494	282.3	282.3
				1495	282.3	282.3
				1496	282.3	282.3
				1497	282.3	282.3
				1498	282.3	282.3
				1499	282.3	282.3
				1500	282.3	282.3
				1501	282.3	282.3
				1502	282.3	282.3
				1503	282.3	282.3
				1504	282.3	282.3
				1505	282.3	282.3
				1506	282.3	282.3
				1507	282.3	282.3
				1508	282.3	282.3
				1509	282.3	282.3
				1510	282.3	282.3
				1511	282.3	282.3
				1512	282.3	282.3
				1513	282.3	282.3
				1514	282.3	282.3
				1515	282.3	282.3
				1516	282.3	282.3
				1517	282.3	282.3
				1518	282.3	282.3
				1519	282.3	282.3
				1520	282.3	282.3
				1521	282.3	282.3
				1522	282.3	282.3
				1523	282.3	282.3
				1524	282.3	282.3
				1525	282.3	282.3
				1526	282.3	282.3
				1527	282.3	282.3
				1528	282.3	282.3
				1529	282.3	282.3
				1530	282.3	282.3
				1531	282.3	282.3
				1532	282.3	282.3
				1533	282.3	282.3
				1534	282.3	282.3
				1535	282.3	282.3
				1536	282.3	282.3
				1537	282.3	282.3
				1538	282.3	282.3
				1539	282.3	282.3
				1540	282.3	282.3
				1541	282.3	282.3
				1542	282.3	282.3
				1543	282.3	282.3
				1544	282.3	282.3
				1545	282.3	282.3
				1546	282.3	282.3
				1547	282.3	282.3
				1548	282.3	282.3
				1549	282.3	282.3
				1550	282.3	282.3
				1551	282.3	282.3
				1552	282.3	282.3
				1553	282.3	282.3
				1554	282.3	282.3
				1555	282.3	282.3
				1556	282.3	282.3
				1557	282.3	282.3
				1558	282.3	282.3
				1559	282.3	282.3
				1560	282.3	282.3
				1561	282.3	282.3
				1562	282.3	282.3
				1563	282.3	282.3
				1564	282.3	282.3
				1565	282.3	282.3
				1566	282.3	282.3
				1567	282.3	282.3
				1568	282.3	282.3
				1569	282.3	282.3
				1570	282.3	282.3
				1571	282.3	282.3
				1572	282.3	282.28
				1573	282.3	282.241
				1574	282.3	282.182
				1575	282.3	282.103
				1576	282.3	282.005
				1577	282.3	281.886
				1578	282.3	281.749
				1579	282.3	281.591
				1580	282.3	281.414
				1581	281.926	281.217
				1582	281.552	281
				1583	281.177	280.764
				1584	280.803	280.508
				1585	280.429	280.232
				1586	280.055	279.937
				1587	279.681	279.622
				1588	279.306	279.287
				1589	278.932	278.932
				1590	278.558	278.558
				1591	278.184	278.184
				1592	277.81	277.81
				1593	277.435	277.435
				1594	277.061	277.061
				1595	276.687	276.687
				1596	276.313	276.313
				1597	275.939	275.939
				1598	275.564	275.564
				1599	275.19	275.19
				1600	274.816	274.816
				1601	274.442	274.442
				1602	274.068	274.068
				1603	273.693	273.725
				1604	273.319	273.413
				1605	272.945	273.132
				1606	272.571	272.883
				1607	272.197	272.665
				1608	271.822	272.477
				1609	271.448	272.322
				1610	271.074	272.197
				1611	270.7	272.104
				1612	270.918	272.041
				1613	271.137	272.01
				1614	271.355	272.01
				1615	271.574	272.042
				1616	271.792	272.104
				1617	272.011	272.198
				1618	272.229	272.323
				1619	272.448	272.479
				1620	272.666	272.666
				1621	272.885	272.885
				1622	273.103	273.103
				1623	273.322	273.322
				1624	273.54	273.54
				1625	273.759	273.759
				1626	273.977	273.977
				1627	274.196	274.196
				1628	274.414	274.414
				1629	274.633	274.633
				1630	274.851	274.84
				1631	275.07	275.035
				1632	275.288	275.219
				1633	275.507	275.392
				1634	275.725	275.553
				1635	275.944	275.703
				1636	276.162	275.841
				1637	276.381	275.967
				1638	276.599	276.082
				1639	276.6	276.186
				1640	276.6	276.278
				1641	276.6	276.358
				1642	276.6	276.427
				1643	276.6	276.485
				1644	276.6	276.531
				1645	276.6	276.565
				1646	276.6	276.588
				1647	276.6	276.6
				1648	276.6	276.6
				1649	276.6	276.6
				1650	276.6	276.6
				1651	276.6	276.6
				1652	276.6	276.6
				1653	276.6	276.6
				1654	276.6	276.6
				1655	276.6	276.6
				1656	276.6	276.6
				1657	276.6	276.6
				1658	276.6	276.6
				1659	276.6	276.6
				1660	276.6	276.6
				1661	276.6	276.6
				1662	276.6	276.6
				1663	276.6	276.6
				1664	276.6	276.6
				1665	276.6	276.6
				1666	276.6	276.6
				1667	276.6	276.6
				1668	276.6	276.6
				1669	276.6	276.6
				1670	276.6	276.6
				1671	276.6	276.6
				1672	276.6	276.6
				1673	276.6	276.6
				1674	276.6	276.6
				1675	276.6	276.6
				1676	276.6	276.6
				1677	276.6	276.6
				1678	276.6	276.6
				1679	276.6	276.6
				1680	276.6	276.6
				1681	276.6	276.6
				1682	276.6	276.6
				1683	276.6	276.6
				1684	276.6	276.6
				1685	276.6	276.6
				1686	276.6	276.6
				1687	276.6	276.6
				1688	276.6	276.6
				1689	276.6	276.6
				1690	276.6	276.6
				1691	276.6	276.6
				1692	276.6	276.6
				1693	276.6	276.6
				1694	276.6	276.6
				1695	276.6	276.6
				1696	276.6	276.6
				1697	276.6	276.6
				1698	276.6	276.6
				1699	276.6	276.6
				1700	276.6	276.6
				1701	276.6	276.6
				1702	276.6	276.6
				1703	276.6	276.6
				1704	276.6	276.6
				1705	276.6	276.6
				1706	276.6	276.6
				1707	276.6	276.6
				1708	276.6	276.6
				1709	276.6	276.6
				1710	276.6	276.6
				1711	276.6	276.6
				1712	276.6	276.6
				1713	276.6	276.6
				1714	276.6	276.6
				1715	276.6	276.6
				1716	276.6	276.6
				1717	276.6	276.6
				1718	276.6	276.6
				1719	276.6	276.6
				1720	276.6	276.6
				1721	276.6	276.6
				1722	276.6	276.6
				1723	276.6	276.6
				1724	276.6	276.6
				1725	276.6	276.6
				1726	276.6	276.6
				1727	276.6	276.6
				1728	276.6	276.6
				1729	276.6	276.6
				1730	276.6	276.6
				1731	276.6	276.6
				1732	276.6	276.6
				1733	276.6	276.6
				1734	276.6	276.6
				1735	276.6	276.6
				1736	276.6	276.6
				1737	276.6	276.6
				1738	276.6	276.6
				1739	276.6	276.6
				1740	276.6	276.6
				1741	276.6	276.6
				1742	276.6	276.6
				1743	276.6	276.6
				1744	276.6	276.6
				1745	276.6	276.6
				1746	276.6	276.6
				1747	276.6	276.6
				1748	276.6	276.6
				1749	276.6	276.6
				1750	276.6	276.6
				1751	276.6	276.6
				1752	276.6	276.6
				1753	276.6	276.6
				1754	276.6	276.6
				1755	276.6	276.6
				1756	276.6	276.6
				1757	276.6	276.6
				1758	276.6	276.6
				1759	276.6	276.6
				1760	276.6	276.6
				1761	276.6	276.6
				1762	276.6	276.6
				1763	276.6	276.6
				1764	276.6
				1765	276.6
				1766	276.6
				1767	276.6
				1768	276.6
				1769	276.6
				1770	276.6
				1771	276.6
